# Supplementary material for: Quantification of myocardial deformation in children by cardiovascular magnetic resonance feature tracking: determination of reference values for left ventricular strain and strain rate
Source: PubMed Central journal article supplement (PMC5248452; doi:10.1186/s12968-016-0310-x), 2016-12-05
Supplement: 12968_2016_310_MOESM1_ESM.pdf [file 12968_2016_310_MOESM1_ESM.pdf]

**Supplementary Table 1 – Centiles of the global peak longitudinal endocardial systolic strain derived only from 4-chamber views**

| <b>BSA</b> | <b>0.025</b> | <b>0.05</b> | <b>0.10</b> | <b>0.90</b> | <b>0.95</b> | <b>0.975</b> |
|------------|--------------|-------------|-------------|-------------|-------------|--------------|
| <b>0.4</b> | -16.0        | -15.5       | -14.9       | -10.4       | -9.8        | -9.3         |
| <b>0.5</b> | -17.9        | -17.2       | -16.4       | -10.9       | -10.2       | -9.5         |
| <b>0.6</b> | -19.6        | -18.8       | -17.9       | -11.4       | -10.5       | -9.7         |
| <b>0.7</b> | -21.1        | -20.2       | -19.2       | -11.9       | -10.9       | -10.0        |
| <b>0.8</b> | -22.5        | -21.5       | -20.4       | -12.4       | -11.2       | -10.2        |
| <b>0.9</b> | -23.7        | -22.6       | -21.4       | -12.8       | -11.6       | -10.5        |
| <b>1.0</b> | -24.7        | -23.6       | -22.3       | -13.2       | -11.9       | -10.8        |
| <b>1.1</b> | -25.6        | -24.4       | -23.1       | -13.6       | -12.3       | -11.1        |
| <b>1.2</b> | -26.2        | -25.0       | -23.7       | -14.0       | -12.6       | -11.5        |
| <b>1.3</b> | -26.7        | -25.5       | -24.2       | -14.4       | -13.0       | -11.8        |
| <b>1.4</b> | -27.1        | -25.9       | -24.5       | -14.7       | -13.4       | -12.2        |
| <b>1.5</b> | -27.3        | -26.1       | -24.7       | -15.1       | -13.7       | -12.5        |
| <b>1.6</b> | -27.2        | -26.1       | -24.8       | -15.4       | -14.1       | -12.9        |
| <b>1.7</b> | -27.1        | -26.0       | -24.7       | -15.7       | -14.4       | -13.3        |
| <b>1.8</b> | -26.7        | -25.7       | -24.5       | -16.0       | -14.8       | -13.8        |
| <b>1.9</b> | -26.2        | -25.3       | -24.1       | -16.3       | -15.2       | -14.2        |

*BSA is given as m<sup>2</sup> and strain values are given as %*

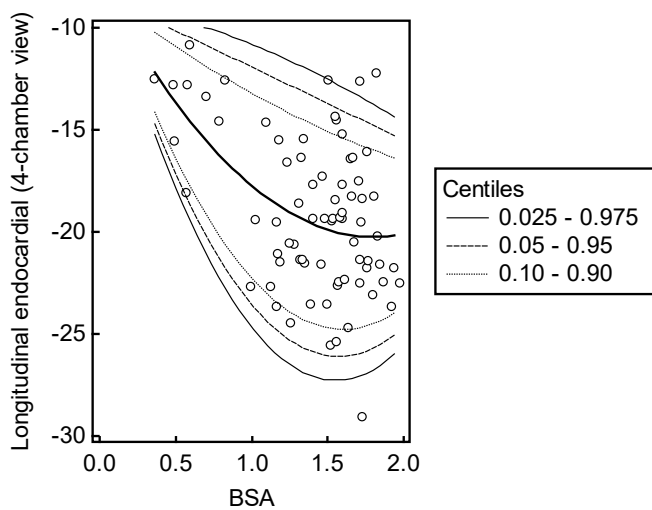

Two outside values were excluded from analysis

**Supplementary Table 2 – Centiles of the global peak longitudinal epicardial systolic strain derived only from 4-chamber views**

| <b>BSA</b> | <b>0.025</b> | <b>0.05</b> | <b>0.10</b> | <b>0.90</b> | <b>0.95</b> | <b>0.975</b> |
|------------|--------------|-------------|-------------|-------------|-------------|--------------|
| <b>0.4</b> | -17.2        | -15.9       | -14.5       | -4.3        | -2.8        | -1.6         |
| <b>0.5</b> | -17.4        | -16.3       | -15.0       | -5.9        | -4.6        | -3.5         |
| <b>0.6</b> | -17.7        | -16.7       | -15.5       | -7.4        | -6.2        | -5.2         |
| <b>0.7</b> | -17.9        | -17.0       | -16.0       | -8.6        | -7.6        | -6.7         |
| <b>0.8</b> | -18.3        | -17.5       | -16.5       | -9.7        | -8.7        | -7.9         |
| <b>0.9</b> | -18.7        | -17.9       | -17.0       | -10.6       | -9.7        | -8.9         |
| <b>1.0</b> | -19.1        | -18.4       | -17.5       | -11.3       | -10.4       | -9.6         |
| <b>1.1</b> | -19.6        | -18.8       | -18.0       | -11.8       | -10.9       | -10.2        |
| <b>1.2</b> | -20.1        | -19.3       | -18.5       | -12.1       | -11.3       | -10.5        |
| <b>1.3</b> | -20.7        | -19.9       | -18.9       | -12.3       | -11.4       | -10.5        |
| <b>1.4</b> | -21.3        | -20.4       | -19.4       | -12.3       | -11.3       | -10.4        |
| <b>1.5</b> | -22.0        | -21.0       | -19.9       | -12.1       | -10.9       | -10.0        |
| <b>1.6</b> | -22.7        | -21.6       | -20.4       | -11.7       | -10.4       | -9.3         |
| <b>1.7</b> | -23.4        | -22.2       | -20.9       | -11.1       | -9.7        | -8.5         |
| <b>1.8</b> | -24.3        | -22.9       | -21.3       | -10.3       | -8.7        | -7.4         |
| <b>1.9</b> | -25.1        | -23.6       | -21.8       | -9.3        | -7.6        | -6.0         |

*BSA is given as m<sup>2</sup> and strain values are given as %*

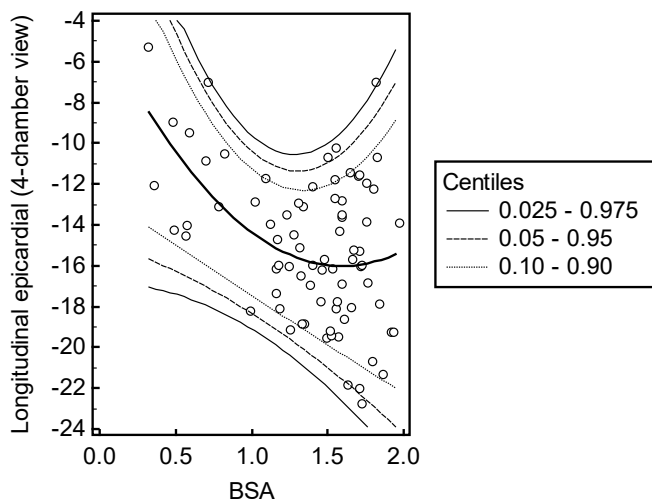

No outside values were detected

**Supplementary Table 3 – Centiles of the early peak longitudinal endocardial diastolic strain rate derived only from 4-chamber views**

| Age  | 0.025 | 0.05 | 0.10 | 0.90 | 0.95 | 0.975 |
|------|-------|------|------|------|------|-------|
| 0.4  | 0.2   | 0.3  | 0.5  | 2.0  | 2.2  | 2.4   |
| 1.0  | 0.3   | 0.5  | 0.7  | 2.1  | 2.3  | 2.5   |
| 2.0  | 0.5   | 0.6  | 0.8  | 2.2  | 2.4  | 2.6   |
| 3.0  | 0.6   | 0.8  | 1.0  | 2.4  | 2.5  | 2.7   |
| 4.0  | 0.8   | 0.9  | 1.1  | 2.5  | 2.6  | 2.8   |
| 5.0  | 0.9   | 1.1  | 1.3  | 2.5  | 2.7  | 2.9   |
| 6.0  | 1.0   | 1.2  | 1.4  | 2.6  | 2.8  | 3.0   |
| 7.0  | 1.1   | 1.3  | 1.4  | 2.7  | 2.8  | 3.0   |
| 8.0  | 1.2   | 1.3  | 1.5  | 2.7  | 2.9  | 3.0   |
| 9.0  | 1.2   | 1.4  | 1.5  | 2.7  | 2.9  | 3.0   |
| 10.0 | 1.2   | 1.4  | 1.6  | 2.7  | 2.9  | 3.0   |
| 11.0 | 1.2   | 1.4  | 1.6  | 2.7  | 2.9  | 3.0   |
| 12.0 | 1.2   | 1.4  | 1.5  | 2.7  | 2.8  | 3.0   |
| 13.0 | 1.2   | 1.3  | 1.5  | 2.6  | 2.8  | 2.9   |
| 14.0 | 1.1   | 1.3  | 1.4  | 2.6  | 2.7  | 2.9   |
| 15.0 | 1.1   | 1.2  | 1.4  | 2.5  | 2.7  | 2.8   |
| 16.0 | 1.0   | 1.1  | 1.3  | 2.4  | 2.6  | 2.7   |
| 17.0 | 0.9   | 1.0  | 1.2  | 2.3  | 2.4  | 2.6   |
| 17.8 | 0.7   | 0.9  | 1.0  | 2.2  | 2.3  | 2.5   |

Age is given as years and strain rate values are given as  $s^{-1}$

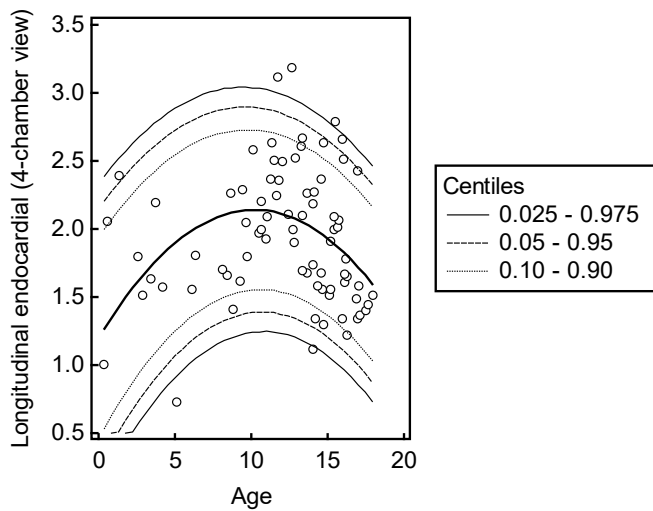

No outside values were detected

**Supplementary Table 4 – Centiles of the early peak longitudinal epicardial diastolic strain rate derived only from 4-chamber views**

| Age  | 0.025 | 0.05 | 0.10 | 0.90 | 0.95 | 0.975 |
|------|-------|------|------|------|------|-------|
| 0.4  | -0.2  | 0.0  | 0.2  | 2.0  | 2.2  | 2.5   |
| 1.0  | -0.1  | 0.1  | 0.4  | 2.0  | 2.2  | 2.4   |
| 2.0  | 0.1   | 0.3  | 0.5  | 2.0  | 2.2  | 2.4   |
| 3.0  | 0.3   | 0.5  | 0.7  | 2.0  | 2.2  | 2.4   |
| 4.0  | 0.5   | 0.7  | 0.8  | 2.0  | 2.2  | 2.4   |
| 5.0  | 0.7   | 0.8  | 1.0  | 2.0  | 2.2  | 2.3   |
| 6.0  | 0.8   | 0.9  | 1.1  | 2.0  | 2.2  | 2.3   |
| 7.0  | 0.9   | 1.0  | 1.1  | 2.0  | 2.2  | 2.3   |
| 8.0  | 1.0   | 1.1  | 1.2  | 2.0  | 2.1  | 2.2   |
| 9.0  | 1.0   | 1.1  | 1.2  | 2.0  | 2.1  | 2.2   |
| 10.0 | 1.1   | 1.2  | 1.3  | 2.0  | 2.1  | 2.2   |
| 11.0 | 1.1   | 1.2  | 1.3  | 2.0  | 2.1  | 2.2   |
| 12.0 | 1.1   | 1.2  | 1.3  | 1.9  | 2.0  | 2.1   |
| 13.0 | 1.0   | 1.1  | 1.2  | 1.9  | 2.0  | 2.1   |
| 14.0 | 1.0   | 1.1  | 1.2  | 1.9  | 2.0  | 2.1   |
| 15.0 | 0.9   | 1.0  | 1.1  | 1.8  | 2.0  | 2.0   |
| 16.0 | 0.8   | 0.9  | 1.0  | 1.8  | 1.9  | 2.0   |
| 17.0 | 0.6   | 0.7  | 0.9  | 1.8  | 1.9  | 2.0   |
| 17.8 | 0.5   | 0.6  | 0.8  | 1.7  | 1.9  | 2.0   |

Age is given as years and strain rate values are given as  $s^{-1}$

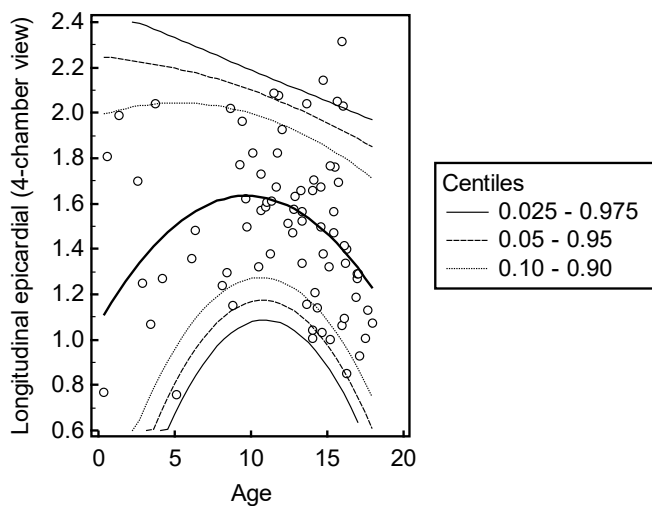

One outside value was excluded from analysis. Please note, that due to the low number of cases for young children predictions are quite imprecise as evident from the large separation of the outer centiles.
